# Supplementary material
Source: PubMed Central journal article supplement (PMC4681621)
Supplement: NIHMS738562-supplement.pdf [file NIHMS738562-supplement.pdf]

## **Differentiation of Oligodendrocyte Precursors is Impaired in the Prefrontal Cortex in Schizophrenia**

Sarah A. Mauney, Charmaine Pietersen, Kai-C Sonntag and Tsung-Ung W. Woo

**Table S1. qRT-PCR validation of microarray data**

**Table S2. Genes differentially expressed in oligodendrocytes in schizophrenia**

**Figure S1. Virtual gels of schizophrenia and normal control RNA samples showing the distribution of transcript lengths**

**Table S1. qRT-PCR validation of microarray data**

| Gene    | qRT-PCR fold-change | Microarray fold-change |
|---------|---------------------|------------------------|
| KBTBD11 | 1.34                | 1.890427899            |
| PDGFRA  | 2.4                 | 1.935126853            |
| NCOR2   | -2.95               | -1.639546104           |
| RGS1    | -1.75               | -2.616661871           |
| FMNL1   | -0.85               | -0.627660814           |
| COPG    | 1.34                | 1.076879269            |

**Table S2. Genes differentially expressed in oligodendrocytes in schizophrenia**

| Gene                                                                                                    | Gene symbol          | Log2 Fold-change | FDR-adjusted P-value |
|---------------------------------------------------------------------------------------------------------|----------------------|------------------|----------------------|
| acyl-CoA thioesterase 13                                                                                | ACOT13               | -1.923781757     | 0.013948217          |
| acyl-CoA synthetase medium-chain family member 2A /// acyl-CoA synthetase medium-chain family member 2B | ACSM2A ///<br>ACSM2B | -2.318142913     | 0.001881298          |
| adenosine deaminase, tRNA-specific 1                                                                    | ADAT1                | -2.127937977     | 0.001753324          |
| alcohol dehydrogenase 5 (class III), chi polypeptide                                                    | ADH5                 | 1.416107999      | 0.03070861           |
| ArfGAP with FG repeats 1                                                                                | AGFG1                | 1.818372885      | 0.030353885          |
| apoptosis-inducing factor, mitochondrion-associated, 2                                                  | AIFM2                | 1.687136644      | 0.005838414          |
| anaphase promoting complex subunit 11                                                                   | ANAPC11              | 1.139599771      | 0.011246383          |
| ANKHD1-EIF4EBP3 readthrough                                                                             | ANKHD1-<br>EIF4EBP3  | -1.772222419     | 0.043405372          |
| ankyrin repeat domain 31                                                                                | ANKRD31              | -2.180879178     | 0.004653257          |
| ankyrin repeat domain 35                                                                                | ANKRD35              | -1.856730612     | 0.012822249          |
| ankyrin repeat domain 43                                                                                | ANKRD43              | 1.292208224      | 0.05246083           |
| acidic (leucine-rich) nuclear phosphoprotein 32 family, member E                                        | ANP32E               | -1.712570785     | 0.040523973          |
| anthrax toxin receptor 1                                                                                | ANTXR1               | 1.857388641      | 0.016866282          |
| adenomatosis polyposis coli 2                                                                           | APC2                 | 1.532765684      | 0.002700679          |
| adenomatosis polyposis coli 2                                                                           | APC2                 | -1.350544989     | 0.009392973          |
| Rho guanine nucleotide exchange factor (GEF) 12                                                         | ARHGEF12             | 1.673344998      | 0.002786736          |
| ADP-ribosylation factor-like 5A                                                                         | ARL5A                | 3.048233409      | 0.000926709          |
| armadillo repeat containing, X-linked 5                                                                 | ARMCX5               | 0.993605366      | 0.010118639          |
| arylsulfatase F                                                                                         | ARSF                 | -2.096424556     | 0.006326775          |
| activating transcription factor 7                                                                       | ATF7                 | 1.254399876      | 0.005990469          |
| activating transcription factor 7                                                                       | ATF7                 | -1.828178868     | 0.006691991          |
| atlastin GTPase 1                                                                                       | ATL1                 | -2.2868529       | 0.00912651           |
| ATP synthase, H <sup>+</sup> transporting, mitochondrial Fo complex, subunit s (factor B)               | ATP5S                | 1.465581557      | 0.010805261          |
| ATXN8 opposite strand (non-protein coding)                                                              | ATXN8OS              | -1.599741055     | 0.039995453          |
| UDP-Gal:betaGal beta 1,3-galactosyltransferase polypeptide 6                                            | B3GALT6              | -1.246953337     | 0.00308456           |
| biliverdin reductase B (flavin reductase (NADPH))                                                       | BLVRB                | -1.911114976     | 0.007035225          |
| bromodomain containing 2                                                                                | BRD2                 | -1.828391724     | 0.00981633           |
| BTB (POZ) domain containing 3                                                                           | BTBD3                | 2.104878068      | 0.002766694          |
| chromosome 12 open reading frame 49                                                                     | C12orf49             | 1.644509939      | 0.010843147          |
| chromosome 13 open reading frame 36                                                                     | C13orf36             | -2.197407835     | 0.007727271          |
| chromosome 14 open reading frame 104                                                                    | C14orf104            | -2.580030551     | 0.001139132          |
| chromosome 14 open reading frame 167                                                                    | C14orf167            | -2.216565578     | 0.01465683           |
| chromosome 14 open reading frame 182                                                                    | C14orf182            | -1.576754981     | 0.006342624          |
| chromosome 14 open reading frame 64                                                                     | C14orf64             | -1.426845924     | 0.05200809           |
| chromosome 15 open reading frame 55                                                                     | C15orf55             | -1.618923323     | 0.003401138          |
| chromosome 17 open reading frame 85                                                                     | C17orf85             | 2.080026521      | 0.01122615           |
| chromosome 1 open reading frame 116                                                                     | C1orf116             | -1.518555301     | 0.029833869          |
| chromosome 1 open reading frame 180                                                                     | C1orf180             | -2.646337646     | 0.004333549          |
| chromosome 1 open reading frame 204                                                                     | C1orf204             | 1.642594136      | 0.003622397          |
| chromosome 20 open reading frame 194                                                                    | C20orf194            | 1.431878349      | 0.021168344          |
| C2 calcium-dependent domain containing 2                                                                | C2CD2                | 1.786659691      | 0.004629782          |
| C2CD2-like                                                                                              | C2CD2L               | -1.889818844     | 0.003984459          |

|                                                                                   |          |              |             |
|-----------------------------------------------------------------------------------|----------|--------------|-------------|
| chromosome 2 open reading frame 24                                                | C2orf24  | 0.959682403  | 0.032456356 |
| chromosome 3 open reading frame 67                                                | C3orf67  | -2.02113273  | 0.00136972  |
| chromosome 4 open reading frame 3                                                 | C4orf3   | 1.991191166  | 0.009076333 |
| chromosome 6 open reading frame 145                                               | C6orf145 | 1.186187291  | 0.012049584 |
| chromosome 6 open reading frame 165                                               | C6orf165 | -1.730078655 | 0.013236394 |
| chromosome 6 open reading frame 218                                               | C6orf218 | -2.106166514 | 0.037935702 |
| calcium channel, voltage-dependent, P/Q type, alpha 1A subunit                    | CACNA1A  | -1.485106659 | 0.016666298 |
| Calcium channel, voltage-dependent, R type, alpha 1E subunit                      | CACNA1E  | -2.025252332 | 0.011529326 |
| calcium channel, voltage-dependent, L type, alpha 1F subunit                      | CACNA1F  | -1.112030437 | 0.043605033 |
| calcium channel, voltage-dependent, beta 1 subunit                                | CACNB1   | -1.165539738 | 0.044181041 |
| cullin-associated and neddylation-dissociated 1                                   | CAND1    | 2.124976855  | 0.009482591 |
| caspase recruitment domain family, member 14                                      | CARD14   | -2.434167054 | 0.001687491 |
| collagen and calcium binding EGF domains 1                                        | CCBE1    | 1.880910995  | 0.003523099 |
| coiled-coil domain containing 13                                                  | CCDC13   | -1.741044105 | 0.003021281 |
| chemokine (C-C motif) ligand 24                                                   | CCL24    | -1.260708936 | 0.039240951 |
| CD209 molecule                                                                    | CD209    | -1.243701771 | 0.049122028 |
| CD300a molecule                                                                   | CD300A   | -1.411924812 | 0.014775556 |
| CD47 molecule                                                                     | CD47     | 2.169314804  | 0.002629511 |
| CD96 molecule                                                                     | CD96     | -2.197156685 | 0.003825296 |
| CDC14 cell division cycle 14 homolog B ( <i>S. cerevisiae</i> )                   | CDC14B   | 0.956431649  | 0.042575032 |
| CDC42 binding protein kinase alpha (DMPK-like)                                    | CDC42BPA | 0.881931721  | 0.011442377 |
| CCAAT/enhancer binding protein (C/EBP), beta                                      | CEBPB    | 2.186859818  | 0.000352872 |
| CUGBP, Elav-like family member 1                                                  | CELF1    | 2.106521086  | 0.024549037 |
| Centrosomal protein 250kDa                                                        | CEP250   | -2.011660385 | 0.001282057 |
| centrosomal protein 350kDa                                                        | CEP350   | 2.197796233  | 0.018931652 |
| centrosomal protein 57kDa                                                         | CEP57    | 1.563795005  | 0.012840618 |
| centrosomal protein 70kDa                                                         | CEP70    | 1.452220986  | 0.03569254  |
| centrosomal protein 97kDa                                                         | CEP97    | 1.812389537  | 0.005486699 |
| Choline/ethanolamine phosphotransferase 1                                         | CEPT1    | -1.902271508 | 0.004661886 |
| choline/ethanolamine phosphotransferase 1                                         | CEPT1    | 1.774133124  | 0.005882454 |
| chromodomain helicase DNA binding protein 9                                       | CHD9     | 1.724040251  | 0.020606464 |
| choline dehydrogenase                                                             | CHDH     | 2.046569322  | 0.026948909 |
| cirrhosis, autosomal recessive 1A (cirhin)                                        | CIRH1A   | 1.894157981  | 0.007548874 |
| Cbp/p300-interacting transactivator, with Glu/Asp-rich carboxy-terminal domain, 2 | CITED2   | -1.727538276 | 0.005048786 |
| claudin 4                                                                         | CLDN4    | -1.639753796 | 0.003843161 |
| chloride intracellular channel 1                                                  | CLIC1    | 2.306583945  | 0.007073497 |
| chloride intracellular channel 4                                                  | CLIC4    | -1.996529969 | 0.000651789 |
| ceroid-lipofuscinosis, neuronal 8 (epilepsy, progressive with mental retardation) | CLN8     | 2.11828994   | 0.004536997 |
| CKLF-like MARVEL transmembrane domain containing 3                                | CMTM3    | -1.316738011 | 0.003969005 |
| coatamer protein complex, subunit gamma                                           | COPG     | 1.076879269  | 0.019429116 |
| coenzyme Q10 homolog A ( <i>S. cerevisiae</i> )                                   | COQ10A   | -1.841285568 | 0.04797491  |
| coenzyme Q10 homolog B ( <i>S. cerevisiae</i> )                                   | COQ10B   | 2.081869701  | 0.008416919 |
| cystatin A (stefin A)                                                             | CSTA     | -1.453959731 | 0.004759876 |
| chromosome X open reading frame 36                                                | CXorf36  | -2.034909497 | 0.013323425 |
| cylindromatosis (turban tumor syndrome)                                           | CYLD     | 1.95628538   | 0.012577542 |

|                                                                                                |            |              |             |
|------------------------------------------------------------------------------------------------|------------|--------------|-------------|
| cytochrome P450, family 4, subfamily F, polypeptide 3                                          | CYP4F3     | -2.25856678  | 0.00114959  |
| cytochrome P450, family 4, subfamily V, polypeptide 2                                          | CYP4V2     | 1.518438108  | 0.002369549 |
| disabled homolog 2, mitogen-responsive phosphoprotein (Drosophila)                             | DAB2       | 2.194042899  | 0.003024329 |
| DCN1, defective in cullin neddylation 1, domain containing 4 (S. cerevisiae)                   | DCUN1D4    | 1.037701778  | 0.048104507 |
| DEAD (Asp-Glu-Ala-Asp) box polypeptide 25                                                      | DDX25      | 1.614596551  | 0.052173581 |
| DEAD (Asp-Glu-Ala-Asp) box polypeptide 3, X-linked                                             | DDX3X      | 1.278488886  | 0.045980227 |
| DiGeorge syndrome critical region gene 8                                                       | DGCR8      | 1.786224142  | 0.020936335 |
| diaphanous homolog 1 (Drosophila)                                                              | DIAPH1     | 1.729895488  | 0.001081654 |
| dickkopf homolog 4 (Xenopus laevis)                                                            | DKK4       | -0.980876942 | 0.036756477 |
| doublesex and mab-3 related transcription factor 1                                             | DMRT1      | -1.94201831  | 0.021276041 |
| dynein, axonemal, heavy chain 11                                                               | DNAH11     | -1.828610643 | 0.008225654 |
| DnaJ (Hsp40) homolog, subfamily A, member 3                                                    | DNAJA3     | 2.160619782  | 0.013382921 |
| dopey family member 2                                                                          | DOPEY2     | -1.707725754 | 0.002577427 |
| deltex homolog 1 (Drosophila)                                                                  | DTX1       | 2.006417914  | 0.005017446 |
| deltex homolog 1 (Drosophila)                                                                  | DTX1       | 1.988540476  | 0.007248929 |
| dual specificity phosphatase 8                                                                 | DUSP8      | 2.391284168  | 0.008644546 |
| EGF-like repeats and discoidin I-like domains 3                                                | EDIL3      | -1.339551648 | 0.01297349  |
| ephrin-A1                                                                                      | EFNA1      | 1.794080612  | 0.003081585 |
| eukaryotic translation initiation factor 1A, Y-linked                                          | EIF1AY     | 1.727918267  | 0.004421071 |
| ELOVL family member 6, elongation of long chain fatty acids (FEN1/Elo2, SUR4/Elo3-like, yeast) | ELOVL6     | 1.753699611  | 0.006632298 |
| echinoderm microtubule associated protein like 1                                               | EML1       | 1.433903504  | 0.035194824 |
| endothelial PAS domain protein 1                                                               | EPAS1      | 1.619645628  | 0.013264682 |
| ER lipid raft associated 1                                                                     | ERLIN1     | 2.147754089  | 0.001232957 |
| family with sequence similarity 108, member B1                                                 | FAM108B1   | 2.157371454  | 0.007125738 |
| family with sequence similarity 160, member B1                                                 | FAM160B1   | -2.46542646  | 0.00356508  |
| family with sequence similarity 173, member A                                                  | FAM173A    | -1.613686189 | 0.01478757  |
| family with sequence similarity 200, member B                                                  | FAM200B    | 1.898163657  | 0.009664746 |
| family with sequence similarity 21, member A ///                                               | FAM21A /// |              |             |
| family with sequence similarity 21, member B ///                                               | FAM21B /// |              |             |
| family with sequence similarity 21, member C ///                                               | FAM21C /// | 1.521608972  | 0.028963187 |
| family with sequence similarity 21, member D                                                   | FAM21D     |              |             |
| family with sequence similarity 3, member A                                                    | FAM3A      | -1.178360929 | 0.025388433 |
| family with sequence similarity 55, member A                                                   | FAM55A     | -2.441965168 | 0.003988946 |
| family with sequence similarity 57, member A                                                   | FAM57A     | 2.473769404  | 0.012691819 |
| Fanconi anemia, complementation group G                                                        | FANCG      | 2.363153262  | 0.004160794 |
| F-box protein 33                                                                               | FBXO33     | 2.239890789  | 0.052856686 |
| fibroblast growth factor receptor 1                                                            | FGFR1      | -2.456370853 | 0.003149392 |
| fibroblast growth factor receptor 1                                                            | FGFR1      | 0.614033972  | 0.036231615 |
| forkhead-associated (FHA) phosphopeptide binding domain 1                                      | FHAD1      | -1.872051293 | 0.004627825 |
| FLT3-interacting zinc finger 1                                                                 | FIZ1       | -0.967210548 | 0.046141277 |
| Friend leukemia virus integration 1                                                            | FLI1       | -2.148419771 | 0.000412232 |
| hypothetical LOC399876                                                                         | FLJ13439   | -1.511931678 | 0.020468356 |

|                                                                                                                                            |                                                                  |              |             |
|--------------------------------------------------------------------------------------------------------------------------------------------|------------------------------------------------------------------|--------------|-------------|
| hypothetical LOC402483 /// hypothetical LOC399744 /// hypothetical LOC401357 /// hypothetical protein LOC729021 /// hypothetical LOC729218 | FLJ45340 /// LOC399744 /// LOC401357 /// LOC729021 /// LOC729218 |              |             |
| formin-like 1                                                                                                                              | FMNL1                                                            | -0.627660814 | 0.05156197  |
| Fibronectin type III domain containing 3B                                                                                                  | FNDC3B                                                           | -1.8868294   | 0.028632616 |
| folliculin-like 1                                                                                                                          | FSTL1                                                            | 2.274981955  | 0.002361778 |
| GTPase activating protein (SH3 domain) binding protein 2                                                                                   | G3BP2                                                            | -1.310946168 | 0.046378331 |
| GRB2-associated binding protein 3                                                                                                          | GAB3                                                             | -2.41131328  | 0.00016526  |
| GATA binding protein 2                                                                                                                     | GATA2                                                            | 2.750130454  | 0.000400838 |
| glucosidase, beta (bile acid) 2                                                                                                            | GBA2                                                             | -1.437395846 | 0.027828361 |
| golgi-associated, gamma adaptin ear containing, ARF binding protein 2                                                                      | GGA2                                                             | 1.808649213  | 0.024783647 |
| gamma-glutamyl hydrolase (conjugase, folic polyglutamate hydrolase)                                                                        | GGH                                                              | -2.273649336 | 0.013273696 |
| geranylgeranyl diphosphate synthase 1                                                                                                      | GGPS1                                                            | -1.824200775 | 0.011365199 |
| gamma-glutamyltransferase 1                                                                                                                | GGT1                                                             | -0.870762544 | 0.012985393 |
| gap junction protein, delta 4, 40.1kDa                                                                                                     | GJD4                                                             | -1.704339971 | 0.003349209 |
| glucuronic acid epimerase                                                                                                                  | GLCE                                                             | 1.914032981  | 0.004869985 |
| glycerate kinase                                                                                                                           | GLYCK                                                            | -1.216229064 | 0.004889698 |
| guanine nucleotide binding protein (G protein), alpha 11 (Gq class)                                                                        | GNA11                                                            | 1.32084553   | 0.007965659 |
| guanine nucleotide binding protein (G protein), alpha 11 (Gq class)                                                                        | GNA11                                                            | -1.616161704 | 0.043343596 |
| guanine nucleotide binding protein (G protein), alpha inhibiting activity polypeptide 1                                                    | GNAI1                                                            | 1.603934746  | 0.049408905 |
| G protein-coupled receptor 68                                                                                                              | GPR68                                                            | -1.667638573 | 0.002932456 |
| G protein regulated inducer of neurite outgrowth 2                                                                                         | GPRIN2                                                           | -1.609995102 | 0.017907965 |
| glycogen synthase kinase 3 beta                                                                                                            | GSK3B                                                            | -1.741191799 | 0.022828576 |
| Glutathione S-transferase theta 1                                                                                                          | GSTT1                                                            | 1.833831727  | 0.018918938 |
| general transcription factor Iii                                                                                                           | GTF2I                                                            | -1.435114964 | 0.030811119 |
| hepatitis B virus x interacting protein                                                                                                    | HBXIP                                                            | 1.713669957  | 0.023254532 |
| holocytochrome c synthase                                                                                                                  | HCCS                                                             | -1.503130209 | 0.026637588 |
| HEAT repeat containing 1                                                                                                                   | HEATR1                                                           | -2.139213887 | 0.036669667 |
| helicase with zinc finger                                                                                                                  | HELZ                                                             | 1.351594982  | 0.036783059 |
| homogentisate 1,2-dioxygenase                                                                                                              | HGD                                                              | -2.256040109 | 0.00153587  |
| histone cluster 1, H1d                                                                                                                     | HIST1H1D                                                         | -1.212445997 | 0.032910387 |
| histone cluster 2, H2aa3 /// histone cluster 2, H2aa4                                                                                      | HIST2H2AA3 /// HIST2H2AA4                                        | -1.63142419  | 0.002243966 |
| heterogeneous nuclear ribonucleoprotein C (C1/C2)                                                                                          | HNRNPC                                                           | -1.75067978  | 0.006093378 |
| heterogeneous nuclear ribonucleoprotein U-like 1                                                                                           | HNRNPUL1                                                         | 1.05896344   | 0.02315213  |
| heterogeneous nuclear ribonucleoprotein D-like                                                                                             | HNRPDL                                                           | 2.317994826  | 0.007426184 |
| HORMA domain containing 2                                                                                                                  | HORMAD2                                                          | -2.085323773 | 0.006629671 |
| homeobox D3                                                                                                                                | HOXD3                                                            | 1.957794903  | 0.016845489 |
| heterochromatin protein 1, binding protein 3                                                                                               | HP1BP3                                                           | -2.228269178 | 0.035996687 |
| Hermansky-Pudlak syndrome 4                                                                                                                | HPS4                                                             | -0.891085868 | 0.006721789 |
| heparan sulfate 6-O-sulfotransferase 3                                                                                                     | HS6ST3                                                           | -1.338471959 | 0.048998052 |
| hydroxysteroid (17-beta) dehydrogenase 7 /// pseudogene 2                                                                                  | HSD17B7 /// HSD17B7P2                                            | -1.946858523 | 0.012463223 |

|                                                                                                                                                      |                              |              |             |
|------------------------------------------------------------------------------------------------------------------------------------------------------|------------------------------|--------------|-------------|
| isopentenyl-diphosphate delta isomerase 2                                                                                                            | IDI2                         | -1.60443483  | 0.013943988 |
| immediate early response 3                                                                                                                           | IER3                         | 2.353255533  | 0.008436659 |
| insulin-like growth factor binding protein-like 1                                                                                                    | IGFBPL1                      | -1.818456087 | 0.012504559 |
| immunoglobulin heavy constant mu                                                                                                                     | IGHM                         | -1.954107237 | 0.003821931 |
| Immunoglobulin kappa constant                                                                                                                        | IGKC                         | -1.411167269 | 0.014870297 |
| interleukin 17B                                                                                                                                      | IL17B                        | 1.19212667   | 0.007179999 |
| Interleukin 4 receptor                                                                                                                               | IL4R                         | -1.82702191  | 0.028208449 |
| inositol polyphosphate-4-phosphatase, type I, 107kDa                                                                                                 | INPP4A                       | 1.210449418  | 0.052922957 |
| integrator complex subunit 5                                                                                                                         | INTS5                        | -1.827004242 | 0.015858591 |
| integrin, beta 3 (platelet glycoprotein IIIa, antigen CD61)                                                                                          | ITGB3                        | -2.648153153 | 0.000393075 |
| integrin, beta-like 1 (with EGF-like repeat domains)                                                                                                 | ITGBL1                       | -1.857638443 | 0.016417382 |
| inter-alpha (globulin) inhibitor H5                                                                                                                  | ITIH5                        | -2.415309492 | 0.003323432 |
| integral membrane protein 2C                                                                                                                         | ITM2C                        | 0.751395169  | 0.013336292 |
| jumonji domain containing 7                                                                                                                          | JMJD7                        | -1.679232343 | 0.014111175 |
| jerky homolog (mouse)                                                                                                                                | JRK                          | -1.093723721 | 0.00471313  |
| jun proto-oncogene                                                                                                                                   | JUN                          | -1.451839093 | 0.008039344 |
| Katanin p80 (WD repeat containing) subunit B 1                                                                                                       | KATNB1                       | -1.488730163 | 0.015561555 |
| kelch repeat and BTB (POZ) domain containing 11                                                                                                      | KBTBD11                      | 1.890427899  | 0.0062759   |
| potassium channel modulatory factor 1                                                                                                                | KCMF1                        | 1.868923542  | 0.003861465 |
| potassium large conductance calcium-activated channel, subfamily M, alpha member 1                                                                   | KCNMA1                       | 2.703413947  | 0.014349863 |
| potassium voltage-gated channel, delayed-rectifier, subfamily S, member 1                                                                            | KCNS1                        | -1.793283088 | 0.013701313 |
| KIAA0182                                                                                                                                             | KIAA0182                     | 1.654024252  | 0.033435203 |
| KIAA0368                                                                                                                                             | KIAA0368                     | 1.873343654  | 0.003147379 |
| KIAA0664-like 3                                                                                                                                      | KIAA0664L3                   | 1.446266386  | 0.010567733 |
| KIAA1267                                                                                                                                             | KIAA1267                     | 2.026138726  | 0.018899796 |
| KIAA1267 /// hypothetical LOC100294337                                                                                                               | KIAA1267 ///<br>LOC100294337 | -1.71483368  | 0.008153374 |
| kelch domain containing 1                                                                                                                            | KLHDC1                       | -1.700084214 | 0.008304861 |
| kelch domain containing 10                                                                                                                           | KLHDC10                      | -2.437749974 | 0.007263004 |
| kelch-like 36 (Drosophila)                                                                                                                           | KLHL36                       | 1.431108118  | 0.054397597 |
| kelch-like 4 (Drosophila)                                                                                                                            | KLHL4                        | -1.59499603  | 0.003949899 |
| KRR1, small subunit (SSU) processome component, homolog (yeast)                                                                                      | KRR1                         | 2.04206037   | 0.022351245 |
| keratin 79                                                                                                                                           | KRT79                        | -1.166347239 | 0.006417514 |
| keratin 80                                                                                                                                           | KRT80                        | -1.702817956 | 0.003413384 |
| laminin, alpha 2                                                                                                                                     | LAMA2                        | -1.747737586 | 0.000394995 |
| leucyl-tRNA synthetase 2, mitochondrial                                                                                                              | LARS2                        | 1.724088975  | 0.005656377 |
| late cornified envelope 3D                                                                                                                           | LCE3D                        | -1.031405327 | 0.007479417 |
| leukocyte receptor cluster (LRC) member 1                                                                                                            | LENG1                        | -1.267296623 | 0.002824358 |
| LIM homeobox 9                                                                                                                                       | LHX9                         | -1.6854513   | 0.005375823 |
| Lectin, mannose-binding 2                                                                                                                            | LMAN2                        | -1.560180222 | 0.023576841 |
| leishmanolysin-like (metallopeptidase M8 family)                                                                                                     | LMLN                         | 2.232009446  | 0.000690385 |
| hypothetical LOC100128175                                                                                                                            | LOC100128175                 | 1.939249051  | 0.00358423  |
| succinate dehydrogenase cytochrome b560 subunit, mitochondrial-like /// succinate dehydrogenase complex, subunit C, integral membrane protein, 15kDa | LOC100128302<br>/// SDHC     | -1.478009081 | 0.036627459 |
| hypothetical LOC100130357                                                                                                                            | LOC100130357                 | 1.595094019  | 0.011126192 |

|                                                                  |                        |              |             |
|------------------------------------------------------------------|------------------------|--------------|-------------|
| hypothetical LOC100130581                                        | LOC100130581           | -2.365367833 | 0.000818251 |
| Hypothetical protein LOC100131180                                | LOC100131180           | -1.983756237 | 0.008163399 |
| Hypothetical LOC100132147                                        | LOC100132147           | -1.260181915 | 0.004977375 |
| hypothetical LOC100132354                                        | LOC100132354           | -1.907390258 | 0.014206018 |
| hypothetical LOC100133039                                        | LOC100133039           | 1.796293152  | 0.003420414 |
| hypothetical LOC100169752                                        | LOC100169752           | -0.912502803 | 0.007533527 |
| hypothetical LOC100272216                                        | LOC100272216           | 2.324446381  | 0.003066251 |
| hypothetical LOC100272217                                        | LOC100272217           | 2.144488186  | 0.007103334 |
| Similar to hCG2024922                                            | LOC100287911           | -1.477312154 | 0.004350168 |
| hypothetical LOC100288271                                        | LOC100288271           | -2.281475156 | 0.001105129 |
| Hypothetical protein LOC100289070                                | LOC100289070           | -1.987079072 | 0.002179802 |
| hypothetical LOC100506556                                        | LOC100506556           | 2.289974339  | 0.004759256 |
| hypothetical LOC100506882                                        | LOC100506882           | -1.609437163 | 0.003297271 |
| hypothetical LOC100506941                                        | LOC100506941           | -1.369257211 | 0.012868409 |
| hypothetical LOC100506992                                        | LOC100506992           | -2.439090254 | 0.000551744 |
| hypothetical LOC100506995                                        | LOC100506995           | -2.4781647   | 0.008766246 |
| hypothetical LOC100507007                                        | LOC100507007           | -1.597185823 | 0.039153094 |
| hypothetical LOC100507164                                        | LOC100507164           | -2.470782897 | 0.001249143 |
| hypothetical LOC100507168                                        | LOC100507168           | -1.482188795 | 0.004422307 |
| hypothetical LOC100507466                                        | LOC100507466           | -1.544526751 | 0.040244612 |
| hypothetical LOC115110                                           | LOC115110              | -1.675226166 | 0.022881609 |
| hypothetical protein LOC257152                                   | LOC257152              | -1.17546414  | 0.01611722  |
| hypothetical LOC282997                                           | LOC282997              | -1.395415835 | 0.023088295 |
| hypothetical protein LOC283270                                   | LOC283270              | 1.556767493  | 0.022604268 |
| hypothetical LOC283335                                           | LOC283335              | -1.421136337 | 0.021224888 |
| hypothetical LOC286114                                           | LOC286114              | -1.57947941  | 0.01990937  |
| hypothetical LOC344595                                           | LOC344595              | -2.459972236 | 0.001693686 |
| hypothetical LOC388796 /// small nucleolar RNA, H/ACA box 71B    | LOC388796 /// SNORA71B | -1.283518389 | 0.046858466 |
| hypothetical LOC401588                                           | LOC401588              | -1.701978343 | 0.025218924 |
| RAB guanine nucleotide exchange factor (GEF) 1 pseudogene        | LOC493754              | -1.135634625 | 0.006088326 |
| Hypothetical protein LOC574538                                   | LOC574538              | -3.222678129 | 0.001968485 |
| hypothetical LOC644450                                           | LOC644450              | -1.584892689 | 0.006921041 |
| Hypothetical LOC644620                                           | LOC644620              | -1.463319191 | 0.042818505 |
| p21 protein (Cdc42/Rac)-activated kinase 2 pseudogene            | LOC646214              | -2.020761941 | 0.015183481 |
| hypothetical LOC729852                                           | LOC729852              | 1.965818756  | 0.01190498  |
| lysophosphatidic acid receptor 4                                 | LPAR4                  | -1.249572208 | 0.007691133 |
| leucine-rich PPR-motif containing                                | LRPPRC                 | 2.575690107  | 0.028402906 |
| leucine rich repeat containing 27                                | LRRC27                 | -1.786878348 | 7.24E-05    |
| leucine rich repeat containing 8 family, member A                | LRRC8A                 | 1.908042011  | 0.008841949 |
| leucine zipper protein 1                                         | LUZP1                  | -2.141739914 | 0.005224197 |
| LYR motif containing 5                                           | LYRM5                  | 1.965775026  | 0.016019259 |
| v-maf musculoaponeurotic fibrosarcoma oncogene homolog G (avian) | MAFG                   | 1.593979978  | 0.053671471 |
| mastermind-like 2 (Drosophila)                                   | MAML2                  | 1.77560605   | 0.012438685 |
| mitogen-activated protein kinase kinase kinase 4                 | MAP4K4                 | 1.916869136  | 0.004468281 |
| MAP7 domain containing 2                                         | MAP7D2                 | -1.86261178  | 0.00956376  |
| MAP7 domain containing 3                                         | MAP7D3                 | -1.206717182 | 0.035013756 |
| mitogen-activated protein kinase 8                               | MAPK8                  | -1.818112335 | 0.014327518 |
| mitogen-activated protein kinase 8 interacting protein 1         | MAPK8IP1               | -1.362082782 | 0.003772316 |



|                                                                            |            |              |             |
|----------------------------------------------------------------------------|------------|--------------|-------------|
| membrane-associated ring finger (C3HC4) 10                                 | MARCH10    | -1.801576406 | 8.30E-05    |
| MCF.2 cell line derived transforming sequence                              | MCF2       | -2.46548925  | 0.005860416 |
| Mdm1 nuclear protein homolog (mouse)                                       | MDM1       | 2.265661348  | 0.009991643 |
| Mediator complex subunit 13                                                | MED13      | -1.888003362 | 0.016760458 |
| mediator complex subunit 28                                                | MED28      | 2.799437607  | 0.000430196 |
| mediator complex subunit 28                                                | MED28      | -1.517478215 | 0.018709715 |
| methyltransferase 11 domain containing 1                                   | METT11D1   | 2.387063123  | 0.001106245 |
| microfibrillar-associated protein 3-like                                   | MFAP3L     | 2.212921696  | 0.005261276 |
| major facilitator superfamily domain containing 4                          | MFSD4      | -1.766079688 | 0.002277426 |
| MAP kinase interacting serine/threonine kinase 2                           | MKNK2      | 1.757862073  | 0.003566982 |
| MAP kinase interacting serine/threonine kinase 2                           | MKNK2      | 1.23985052   | 0.032164014 |
| myeloid/lymphoid or mixed-lineage leukemia (trithorax homolog, Drosophila) | MLL        | -1.370011059 | 0.014429638 |
| major histocompatibility complex, class I-related                          | MR1        | -0.864714938 | 0.047872728 |
| mitochondrial ribosomal protein L2                                         | MRPL2      | -2.268659943 | 0.000562097 |
| mitochondrial ribosomal protein L9                                         | MRPL9      | -1.473411436 | 0.012450867 |
| msh homeobox 2                                                             | MSX2       | -1.654307082 | 0.018751661 |
| methylenetetrahydrofolate dehydrogenase (NADP+ dependent) 2-like           | MTHFD2L    | -1.766127304 | 0.005224676 |
| mitochondrial translational release factor 1                               | MTRF1      | -3.40886833  | 1.80E-07    |
| metastasis suppressor 1                                                    | MTSS1      | 1.763366395  | 0.016109176 |
| mucin 5AC, oligomeric mucus/gel-forming                                    | MUC5AC     | 1.252904056  | 0.026563795 |
| myeloid-associated differentiation marker                                  | MYADM      | -2.112916996 | 0.00052162  |
| myosin, heavy chain 8, skeletal muscle, perinatal                          | MYH8       | -2.226120612 | 0.000972652 |
| myoferlin                                                                  | MYOF       | -1.537121166 | 0.033532061 |
| Myb-like, SWIRM and MPN domains 1                                          | MYSM1      | -1.387142448 | 0.023281344 |
| nuclear cap binding protein subunit 1, 80kDa                               | NCBP1      | -0.955662507 | 0.001833535 |
| neutral cholesterol ester hydrolase 1                                      | NCEH1      | -1.607792447 | 0.027810923 |
| nuclear receptor corepressor 1                                             | NCOR1      | 1.430887271  | 0.005028979 |
| nuclear receptor corepressor 2                                             | NCOR2      | -1.639546104 | 0.00820626  |
| non-protein coding RNA 102                                                 | NCRNA00102 | -2.005607149 | 0.011523766 |
| non-protein coding RNA 107                                                 | NCRNA00107 | 1.789190327  | 0.050566524 |
| non-protein coding RNA 188                                                 | NCRNA00188 | -1.648794425 | 0.018391145 |
| NIMA (never in mitosis gene a)- related kinase 11                          | NEK11      | -2.454979305 | 0.007789592 |
| NEL-like 1 (chicken)                                                       | NELL1      | -2.282135473 | 0.003463382 |
| nuclear factor I/A                                                         | NFIA       | -2.283436204 | 0.002212056 |
| nuclear factor I/A                                                         | NFIA       | 1.808503755  | 0.003994386 |
| nescient helix loop helix 2                                                | NHLH2      | 2.325017403  | 0.002792833 |
| nescient helix loop helix 2                                                | NHLH2      | 1.739648666  | 0.011327974 |
| ninein-like                                                                | NINL       | 1.573417911  | 0.029398289 |
| NLR family, pyrin domain containing 12                                     | NLRP12     | -1.461181341 | 0.008922641 |
| NMD3 homolog (S. cerevisiae)                                               | NMD3       | -2.503440961 | 0.005436676 |
| notch 2                                                                    | NOTCH2     | -1.307654818 | 0.022620206 |
| nuclear receptor subfamily 3, group C, member 1 (glucocorticoid receptor)  | NR3C1      | 1.526015261  | 0.042090167 |
| 5'-nucleotidase domain containing 2                                        | NT5DC2     | -1.745628556 | 0.010477016 |
| 5',3'-nucleotidase, mitochondrial                                          | NT5M       | -1.663663467 | 0.013263594 |
| nuclear VCP-like                                                           | NVL        | 3.329494152  | 0.00078915  |
| oral-facial-digital syndrome 1                                             | OFD1       | 2.617818121  | 0.002536412 |
| osteoglycin                                                                | OGN        | -2.107570331 | 0.001074635 |
| olfactory receptor, family 1, subfamily E, member 1                        | OR1E1      | -1.730346585 | 0.020459938 |
| olfactory receptor, family 2, subfamily L, member 2                        | OR2L2      | -1.515354999 | 0.01179742  |

|                                                                                                           |               |              |             |
|-----------------------------------------------------------------------------------------------------------|---------------|--------------|-------------|
| olfactory receptor, family 2, subfamily S, member 2                                                       | OR2S2         | -1.566869984 | 0.028254874 |
| olfactory receptor, family 5, subfamily V, member 1                                                       | OR5V1         | -1.937567047 | 0.029985648 |
| olfactory receptor, family 9, subfamily A, member 1 pseudogene                                            | OR9A1P        | -1.310905959 | 0.035179354 |
| ORAI calcium release-activated calcium modulator 2                                                        | ORAI2         | -2.136702172 | 0.000821389 |
| orosomuroid 1 /// orosomuroid 2                                                                           | ORM1 /// ORM2 | -1.160081008 | 0.001659592 |
| oxidation resistance 1                                                                                    | OXR1          | -2.098818364 | 0.004047149 |
| platelet-activating factor acetylhydrolase 2, 40kDa                                                       | PAFAH2        | -0.959191788 | 0.011010042 |
| Palladin, cytoskeletal associated protein                                                                 | PALLD         | -1.200683924 | 0.017301233 |
| parvin, alpha                                                                                             | PARVA         | -1.60063743  | 0.046601279 |
| PRKC, apoptosis, WT1, regulator                                                                           | PAWR          | 2.109517407  | 0.00449821  |
| phosphodiesterase 7A                                                                                      | PDE7A         | 0.972354038  | 0.031180191 |
| platelet-derived growth factor receptor, alpha polypeptide                                                | PDGFRA        | 1.935126853  | 0.028282159 |
| PDS5, regulator of cohesion maintenance, homolog A (S. cerevisiae)                                        | PDS5A         | 1.754617084  | 0.007769419 |
| 6-phosphofructo-2-kinase/fructose-2,6-biphosphatase 2                                                     | PFKFB2        | 2.370167303  | 0.000951935 |
| progesterone receptor membrane component 2                                                                | PGRMC2        | 1.338443698  | 0.024111438 |
| phosphorylated adaptor for RNA export                                                                     | PHAX          | -1.35095859  | 0.005338234 |
| PHD finger protein 15                                                                                     | PHF15         | 2.421430989  | 0.002725952 |
| PHD finger protein 15                                                                                     | PHF15         | 2.901601455  | 0.019727518 |
| PHD finger protein 17                                                                                     | PHF17         | 1.674119672  | 0.006757104 |
| PHD finger protein 8                                                                                      | PHF8          | 1.596392129  | 0.028936903 |
| phytanoyl-CoA 2-hydroxylase interacting protein                                                           | PHYHIP        | -1.119499206 | 0.000817755 |
| phosphoinositide-3-kinase, catalytic, alpha polypeptide                                                   | PIK3CA        | 1.681566587  | 0.006922502 |
| phospholipase A2, group XIIA                                                                              | PLA2G12A      | 2.803929806  | 0.006205703 |
| phospholipase A2, group VII (platelet-activating factor acetylhydrolase, plasma)                          | PLA2G7        | -1.196056764 | 0.054031845 |
| polo-like kinase 1 substrate 1                                                                            | PLK1S1        | 1.584696782  | 0.029056846 |
| polo-like kinase 3                                                                                        | PLK3          | -1.424543388 | 0.011278168 |
| polymerase (RNA) III (DNA directed) polypeptide A, 155kDa                                                 | POLR3A        | 1.642209335  | 0.025799614 |
| hypothetical LOC100128046                                                                                 | PP13439       | -2.064239132 | 0.006501181 |
| protein tyrosine phosphatase, receptor type, f polypeptide (PTPRF), interacting protein (liprin), alpha 1 | PPFIA1        | 1.809825953  | 0.001718653 |
| peptidylprolyl isomerase G (cyclophilin G)                                                                | PPIG          | -1.699438084 | 0.020634328 |
| protein phosphatase, Mg <sup>2+</sup> /Mn <sup>2+</sup> dependent, 1B                                     | PPM1B         | 0.590369891  | 0.012272291 |
| protein phosphatase 1, regulatory (inhibitor) subunit 3E                                                  | PPP1R3E       | 2.977047587  | 0.002579784 |
| peroxisomal proliferator-activated receptor A interacting complex 285                                     | PRIC285       | -0.875311281 | 0.039119959 |
| protein kinase, cAMP-dependent, regulatory, type II, alpha                                                | PRKAR2A       | 2.131309864  | 0.024441839 |
| protein kinase D1                                                                                         | PRKD1         | 1.659810448  | 0.039854808 |
| protein kinase, Y-linked                                                                                  | PRKY          | -1.121699717 | 0.006366022 |
| prolactin receptor                                                                                        | PRLR          | -1.613036481 | 0.006048558 |
| protamine 3                                                                                               | PRM3          | -1.638639224 | 0.020266155 |

|                                                                            |         |              |             |
|----------------------------------------------------------------------------|---------|--------------|-------------|
| hypothetical protein PRO2949                                               | PRO2949 | -1.362306203 | 0.003312296 |
| PSMC3 interacting protein                                                  | PSMC3IP | 1.330124293  | 0.048196655 |
| polypyrimidine tract binding protein 1                                     | PTBP1   | -1.729592465 | 0.004238948 |
| prostaglandin reductase 2                                                  | PTGR2   | -2.269827623 | 0.008459491 |
| parathyroid hormone 2                                                      | PTH2    | -1.00977801  | 0.022902417 |
| parathyroid hormone-like hormone                                           | PTHLH   | -1.694821963 | 0.02052041  |
| protein tyrosine phosphatase domain containing 1                           | PTPDC1  | 1.321365734  | 0.032145391 |
| Protein tyrosine phosphatase, non-receptor type 9                          | PTPN9   | -2.222593714 | 0.000533207 |
| pituitary tumor-transforming 1                                             | PTTG1   | 1.997121745  | 0.01379026  |
| pumilio homolog 1 (Drosophila)                                             | PUM1    | 0.961668058  | 0.006127485 |
| poliovirus receptor                                                        | PVR     | 1.199197874  | 0.015909269 |
| Pvt1 oncogene (non-protein coding)                                         | PVT1    | -2.139905823 | 0.009610305 |
| RAB30, member RAS oncogene family                                          | RAB30   | 1.028817748  | 0.041808333 |
| RAB5C, member RAS oncogene family                                          | RAB5C   | -2.130888993 | 0.002020749 |
| RAD23 homolog A (S. cerevisiae)                                            | RAD23A  | -1.405791744 | 0.006609832 |
| Ral GEF with PH domain and SH3 binding motif 1                             | RALGPS1 | 1.169141698  | 0.054428345 |
| Ras association (RalGDS/AF-6) and pleckstrin homology domains 1            | RAPH1   | -1.342633909 | 0.046658343 |
| Ras association (RalGDS/AF-6) domain family member 6                       | RASSF6  | -1.956186111 | 0.000867459 |
| Ras association (RalGDS/AF-6) domain family (N-terminal) member 8          | RASSF8  | 2.265668336  | 0.00280088  |
| RNA binding motif protein 23                                               | RBM23   | 1.752427041  | 0.008836646 |
| RNA binding motif protein 33                                               | RBM33   | 1.568155676  | 0.013445794 |
| retinol dehydrogenase 14 (all-trans/9-cis/11-cis)                          | RDH14   | 1.314123834  | 0.037713283 |
| replication factor C (activator 1) 5, 36.5kDa                              | RFC5    | -2.589080514 | 5.67E-05    |
| regulator of G-protein signaling 1                                         | RGS1    | -2.616661871 | 0.00186756  |
| Rho-related BTB domain containing 2                                        | RHOBTB2 | -1.346290398 | 0.052936158 |
| ring finger protein 126                                                    | RNF126  | -1.301130026 | 0.011350291 |
| ring finger protein 213                                                    | RNF213  | 1.815452219  | 0.013728683 |
| Ring finger protein 31                                                     | RNF31   | -1.062695451 | 0.006962925 |
| RNA (guanine-7-) methyltransferase                                         | RNMT    | -2.008185784 | 0.006317329 |
| retinitis pigmentosa GTPase regulator                                      | RPGR    | -1.735013639 | 0.027329674 |
| ribosomal RNA processing 15 homolog (S. cerevisiae)                        | RRP15   | 2.014960143  | 0.003409456 |
| runt-related transcription factor 1; translocated to, 1 (cyclin D-related) | RUNX1T1 | -2.398388144 | 0.000580142 |
| sarcoma antigen 1                                                          | SAGE1   | -2.367149701 | 0.001445319 |
| SAR1 homolog A (S. cerevisiae)                                             | SAR1A   | 1.541800042  | 0.017590116 |
| sodium channel, voltage-gated, type XI, alpha subunit                      | SCN11A  | -2.361925576 | 0.004164986 |
| Sec23 homolog B (S. cerevisiae)                                            | SEC23B  | 1.943209786  | 0.010253037 |
| sel-1 suppressor of lin-12-like 3 (C. elegans)                             | SEL1L3  | -1.9497525   | 0.002275016 |
| SET domain, bifurcated 2                                                   | SETDB2  | -2.538368061 | 0.001979599 |
| senataxin                                                                  | SETX    | 1.460557692  | 0.003275429 |
| senataxin                                                                  | SETX    | 1.725538535  | 0.030492283 |
| SHC (Src homology 2 domain containing) transforming protein 3              | SHC3    | -1.379431704 | 0.041822744 |
| seven in absentia homolog 1 (Drosophila)                                   | SIAH1   | 2.425511012  | 8.98E-05    |
| SIN3 homolog B, transcription regulator (yeast)                            | SIN3B   | -2.377227209 | 0.003652938 |

|                                                                                                      |                |              |             |
|------------------------------------------------------------------------------------------------------|----------------|--------------|-------------|
| spindle and kinetochore associated complex subunit 2                                                 | SKA2           | -2.601670966 | 0.00568977  |
| solute carrier family 25 (mitochondrial carrier, brain), member 14                                   | SLC25A14       | 2.472471119  | 0.000576853 |
| solute carrier family 26 (sulfate transporter), member 2                                             | SLC26A2        | 2.074382164  | 0.003145485 |
| solute carrier family 2 (facilitated glucose transporter), member 1                                  | SLC2A1         | 1.544108206  | 0.025454861 |
| solute carrier family 35, member A4                                                                  | SLC35A4        | -1.504601415 | 0.01272245  |
| solute carrier family 35 (UDP-glucuronic acid/UDP-N-acetylgalactosamine dual transporter), member D1 | SLC35D1        | -2.067783059 | 0.006885697 |
| solute carrier family 9 (sodium/hydrogen exchanger), member 5                                        | SLC9A5         | -1.253165048 | 0.006329982 |
| SMAD family member 2                                                                                 | SMAD2          | -1.581149219 | 0.038286276 |
| SWI/SNF related, matrix associated, actin dependent regulator of chromatin, subfamily a, member 1    | SMARCA1        | -1.297240048 | 0.035431733 |
| structural maintenance of chromosomes 2                                                              | SMC2           | 2.500826277  | 4.29E-05    |
| SNF8, ESCRT-II complex subunit, homolog (S. cerevisiae)                                              | SNF8           | 2.002783057  | 0.000605843 |
| small nucleolar RNA host gene 10 (non-protein coding)                                                | SNHG10         | 1.427835861  | 0.041493594 |
| small nuclear ribonucleoprotein 27kDa (U4/U6.U5)                                                     | SNRNP27        | 1.940798481  | 0.003704401 |
| SNW domain containing 1                                                                              | SNW1           | 1.899918696  | 0.034664783 |
| sorting nexin 2                                                                                      | SNX2           | 1.957270771  | 0.022093178 |
| sorting nexin 22                                                                                     | SNX22          | -1.325975143 | 0.010888669 |
| sorbin and SH3 domain containing 1                                                                   | SORBS1         | 3.1656514    | 4.77E-05    |
| SRY (sex determining region Y)-box 6                                                                 | SOX6           | -1.789593325 | 0.029901042 |
| sperm associated antigen 5                                                                           | SPAG5          | 1.219118635  | 0.019027182 |
| spermatogenesis associated 19                                                                        | SPATA19        | 1.659772347  | 0.004770328 |
| spermatogenesis associated, serine-rich 2                                                            | SPATS2         | -1.363641953 | 0.008702852 |
| serine peptidase inhibitor, Kazal type 4                                                             | SPINK4         | -1.79437552  | 0.000591941 |
| speckle-type POZ protein-like                                                                        | SPOPL          | 1.206078851  | 0.022952804 |
| Snf2-related CREBBP activator protein                                                                | SRCAP          | -0.809964237 | 0.050307509 |
| slingshot homolog 1 (Drosophila)                                                                     | SSH1           | -1.819686613 | 0.01857738  |
| signal sequence receptor, gamma (translocon-associated protein gamma)                                | SSR3           | 0.97423878   | 0.037411746 |
| synovial sarcoma, X breakpoint 2 /// synovial sarcoma, X breakpoint 2B                               | SSX2 /// SSX2B | -1.274417434 | 0.019863504 |
| synovial sarcoma, X breakpoint 2 interacting protein                                                 | SSX2IP         | 1.913359595  | 0.012698243 |
| suppression of tumorigenicity 7                                                                      | ST7            | -2.090676315 | 0.007522863 |
| staufer, RNA binding protein, homolog 2 (Drosophila)                                                 | STAU2          | -2.140417604 | 0.003351642 |
| serine/threonine kinase 36                                                                           | STK36          | -1.14906968  | 0.014579003 |
| syntaxin 6                                                                                           | STX6           | 1.927749666  | 0.008782402 |
| suppressor of Ty 16 homolog (S. cerevisiae)                                                          | SUPT16H        | -1.762552104 | 0.037005058 |
| synapsin I                                                                                           | SYN1           | -2.190196166 | 0.003017236 |
| SYS1 Golgi-localized integral membrane protein homolog (S. cerevisiae)                               | SYS1           | -1.775295342 | 0.006454992 |
| synaptotagmin XV                                                                                     | SYT15          | -1.456271488 | 0.009024538 |

|                                                                                                           |                                  |              |             |
|-----------------------------------------------------------------------------------------------------------|----------------------------------|--------------|-------------|
| TAF4b RNA polymerase II, TATA box binding protein (TBP)-associated factor, 105kDa                         | TAF4B                            | -1.325459859 | 0.043284082 |
| TANK-binding kinase 1                                                                                     | TBK1                             | -1.168493645 | 0.005432759 |
| transcription elongation factor A (SII) N-terminal and central domain containing                          | TCEANC                           | -1.140290571 | 0.031431543 |
| transcription elongation factor B (SIII), polypeptide 1 (15kDa, elongin C)                                | TCEB1                            | 1.395875118  | 0.01578964  |
| transcription factor 12                                                                                   | TCF12                            | 1.986270721  | 0.018625183 |
| testis expressed 13B                                                                                      | TEX13B                           | -1.248710619 | 0.005466337 |
| transcription factor AP-4 (activating enhancer binding protein 4)                                         | TFAP4                            | 1.776675814  | 0.001677112 |
| transcription factor Dp-1                                                                                 | TFDP1                            | -1.66751551  | 0.030664227 |
| thyroid hormone receptor, beta (erythroblastic leukemia viral (v-erb-a) oncogene homolog 2, avian)        | THRB                             | -1.426761142 | 0.003768353 |
| T cell immunoreceptor with Ig and ITIM domains                                                            | TIGIT                            | -1.036691774 | 0.053030679 |
| translocase of inner mitochondrial membrane 8 homolog A (yeast)                                           | TIMM8A                           | -1.955344462 | 0.00527223  |
| transducin-like enhancer of split 4 (E(sp1) homolog, Drosophila)                                          | TLE4                             | -2.006332764 | 0.01961207  |
| transmembrane protein 106C                                                                                | TMEM106C                         | -1.43649337  | 0.014980129 |
| transmembrane protein 18                                                                                  | TMEM18                           | 1.753258875  | 0.001085338 |
| transmembrane protein 198                                                                                 | TMEM198                          | 1.637449217  | 0.008597806 |
| transmembrane protein 218                                                                                 | TMEM218                          | 1.965034085  | 0.004134009 |
| transmembrane protein 64                                                                                  | TMEM64                           | -1.402751087 | 0.007482381 |
| TMEM9 domain family, member B                                                                             | TMEM9B                           | 1.585927384  | 0.004162305 |
| thioredoxin-related transmembrane protein 4                                                               | TMX4                             | 1.92730926   | 0.002286309 |
| transition protein 2 (during histone to protamine replacement)                                            | TNP2                             | -1.615523007 | 0.005686633 |
| T cell receptor alpha constant /// T cell receptor alpha joining 17 /// T cell receptor alpha variable 20 | TRAC ///<br>TRAJ17 ///<br>TRAV20 | -2.65031686  | 0.002715363 |
| TNF receptor-associated factor 3                                                                          | TRAF3                            | -1.948884888 | 0.004402883 |
| TRAF3 interacting protein 3                                                                               | TRAF3IP3                         | -1.970346371 | 0.000482277 |
| tripartite motif-containing 2                                                                             | TRIM2                            | -1.982412312 | 0.005226112 |
| tripartite motif-containing 46                                                                            | TRIM46                           | 1.294763067  | 0.01131572  |
| tripartite motif-containing 9                                                                             | TRIM9                            | -1.587399106 | 0.022467195 |
| TruB pseudouridine (psi) synthase homolog 2 (E. coli)                                                     | TRUB2                            | -1.800946253 | 0.00215984  |
| tetraspanin 31                                                                                            | TSPAN31                          | 2.975798389  | 0.000699631 |
| tetratricopeptide repeat domain 31                                                                        | TTC31                            | 1.725118081  | 0.001047    |
| tocopherol (alpha) transfer protein-like                                                                  | TTPAL                            | 1.662041747  | 0.022951187 |
| testis-specific transcript, Y-linked 13 (non-protein coding)                                              | TTYT13                           | -1.480595973 | 0.001848697 |
| tubulin, gamma 2                                                                                          | TUBG2                            | 1.966918829  | 0.026862669 |
| Tu translation elongation factor, mitochondrial                                                           | TUFM                             | -1.691825249 | 0.007882064 |
| thymidine phosphorylase                                                                                   | TYMP                             | -1.595133069 | 0.013812509 |
| ubiquitin-conjugating enzyme E2E 2 (UBC4/5 homolog, yeast)                                                | UBE2E2                           | 2.704964988  | 0.004526747 |
| ubiquitin-conjugating enzyme E2N-like                                                                     | UBE2NL                           | -2.660371675 | 0.000946591 |
| U-box domain containing 5                                                                                 | UBOX5                            | 1.888416492  | 0.019581453 |
| UBX domain protein 8                                                                                      | UBXN8                            | -2.329553217 | 0.001732837 |
| UPF3 regulator of nonsense transcripts homolog B (yeast)                                                  | UPF3B                            | 2.110698011  | 0.030582292 |

|                                                     |         |              |             |
|-----------------------------------------------------|---------|--------------|-------------|
| ubiquitin specific peptidase 19                     | USP19   | 1.651380324  | 0.043357642 |
| ubiquitin specific peptidase 2                      | USP2    | -2.213688616 | 0.000273064 |
| ubiquitin specific peptidase 33                     | USP33   | 1.524696202  | 0.033510123 |
| ubiquitin specific peptidase 34                     | USP34   | -2.01951521  | 0.008375098 |
| pre-B lymphocyte 1                                  | VPREB1  | -1.67241459  | 0.024473453 |
| vacuolar protein sorting 39 homolog (S. cerevisiae) | VPS39   | 1.366990205  | 0.006636035 |
| vacuolar protein sorting 39 homolog (S. cerevisiae) | VPS39   | 1.364303996  | 0.011756772 |
| WW domain binding protein 5                         | WBP5    | 1.729994219  | 0.007520719 |
| WD repeat domain 66                                 | WDR66   | -1.542297285 | 0.01397923  |
| WD repeat domain 90                                 | WDR90   | -0.538246092 | 0.046140206 |
| WD and tetratricopeptide repeats 1                  | WDTC1   | 2.612838936  | 0.001855751 |
| Yip1 interacting factor homolog B (S. cerevisiae)   | YIF1B   | -0.903775828 | 0.005265459 |
| yippee-like 4 (Drosophila)                          | YPEL4   | 1.287404684  | 0.018743698 |
| yrdC domain containing (E. coli)                    | YRDC    | 1.134460703  | 0.01495258  |
| YTH domain family, member 2                         | YTHDF2  | -2.195665588 | 0.007736222 |
| YY2 transcription factor                            | YY2     | -2.127024156 | 0.000514878 |
| Zinc finger, AN1-type domain 6                      | ZFAND6  | -1.731305801 | 0.008076044 |
| zinc finger protein 10                              | ZNF10   | -1.970045688 | 0.001096795 |
| Zinc finger protein 117                             | ZNF117  | -2.603483817 | 0.003059113 |
| Zinc finger protein 131                             | ZNF131  | -2.073792796 | 0.003160802 |
| zinc finger protein 131                             | ZNF131  | 1.859210685  | 0.031487888 |
| zinc finger protein 189                             | ZNF189  | 1.901792011  | 0.008075307 |
| zinc finger protein 263                             | ZNF263  | 1.711155662  | 0.017380837 |
| zinc finger protein 282                             | ZNF282  | 1.642105204  | 0.007876143 |
| zinc finger protein 343                             | ZNF343  | -1.340970131 | 0.026452431 |
| zinc finger protein 430                             | ZNF430  | -1.35496225  | 0.024419221 |
| zinc finger protein 441                             | ZNF441  | -2.355139073 | 0.000335024 |
| zinc finger protein 512B                            | ZNF512B | -2.174937225 | 0.011007183 |
| zinc finger protein 587                             | ZNF587  | -2.15880446  | 0.012489022 |
| zinc finger protein 599                             | ZNF599  | 1.483916458  | 0.00558898  |
| zinc finger protein 667                             | ZNF667  | -1.131847403 | 0.00337552  |
| zinc finger protein 697                             | ZNF697  | 2.108817766  | 0.0136406   |
| zinc finger protein 77                              | ZNF77   | -1.014310584 | 0.01532253  |
| zinc finger protein 846                             | ZNF846  | -1.612087755 | 0.001094848 |
| zinc finger, NFX1-type containing 1                 | ZNFX1   | 2.0629443    | 0.008257172 |
| zinc finger and SCAN domain containing 21           | ZSCAN21 | -1.856286235 | 0.014865884 |

---

### Schizophrenia samples

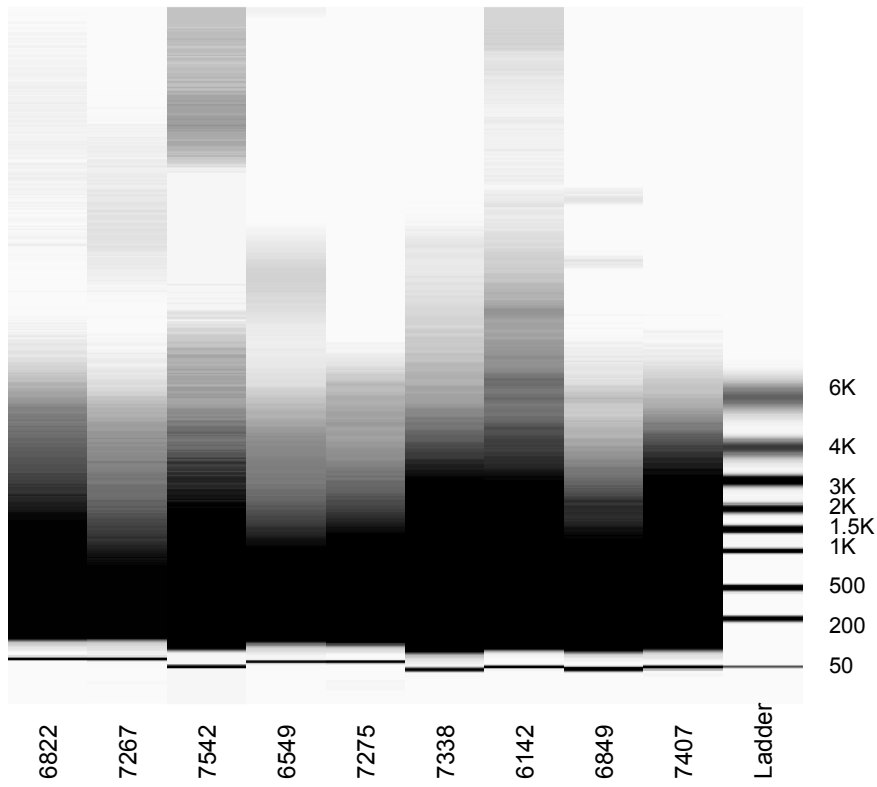

### Control samples

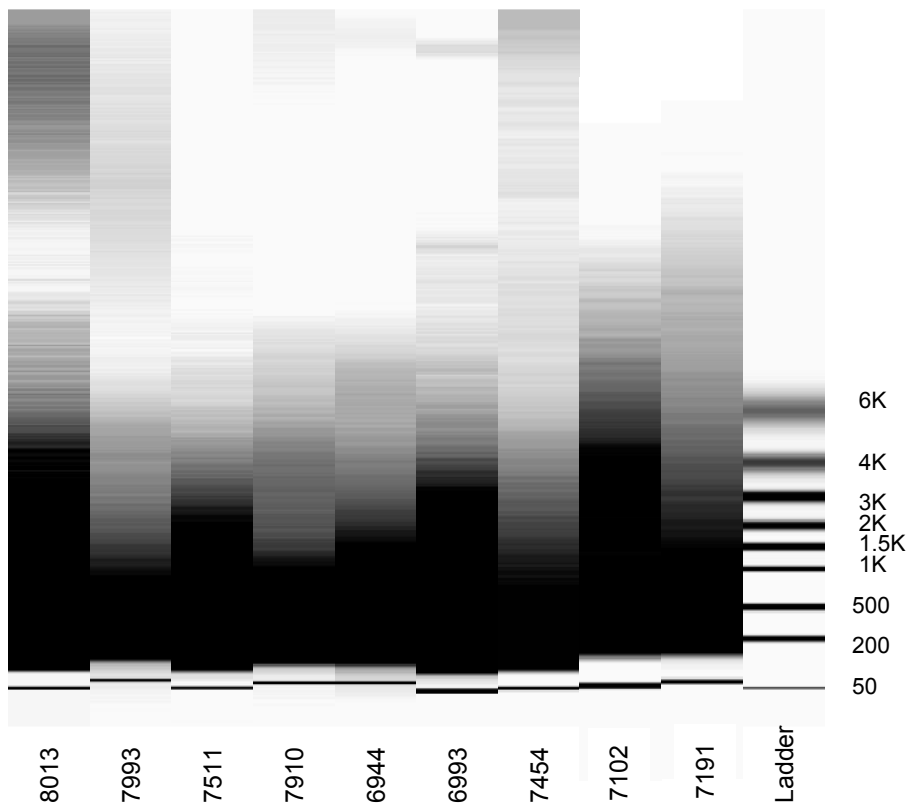

Figure S1
